# Supplementary material
Source: Springer Nature journal article supplement (https://www.springermedizin.de/resource/supplementary/12935_2009_233_MOESM3_ESM.pdf/9540158)
Supplement: MOESM3 [file 9540158]

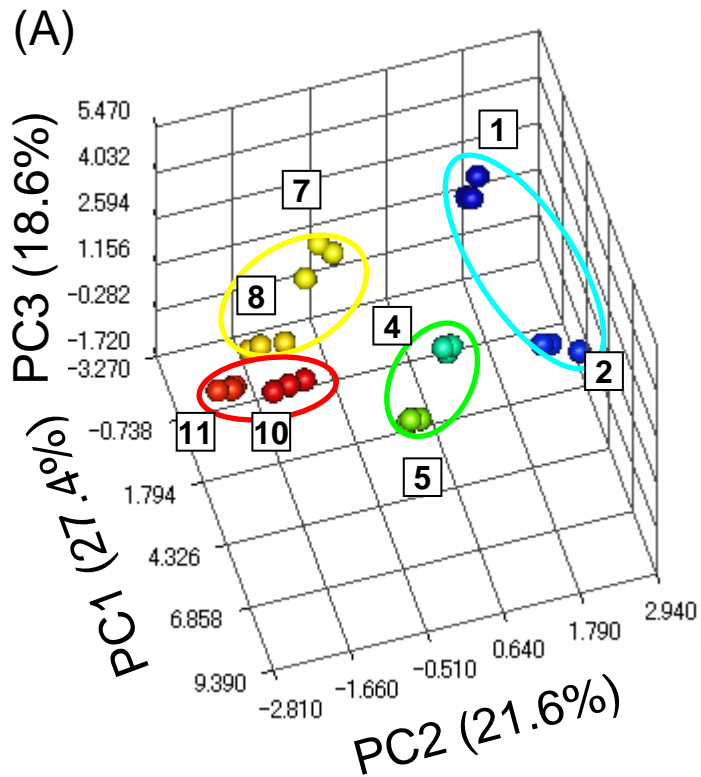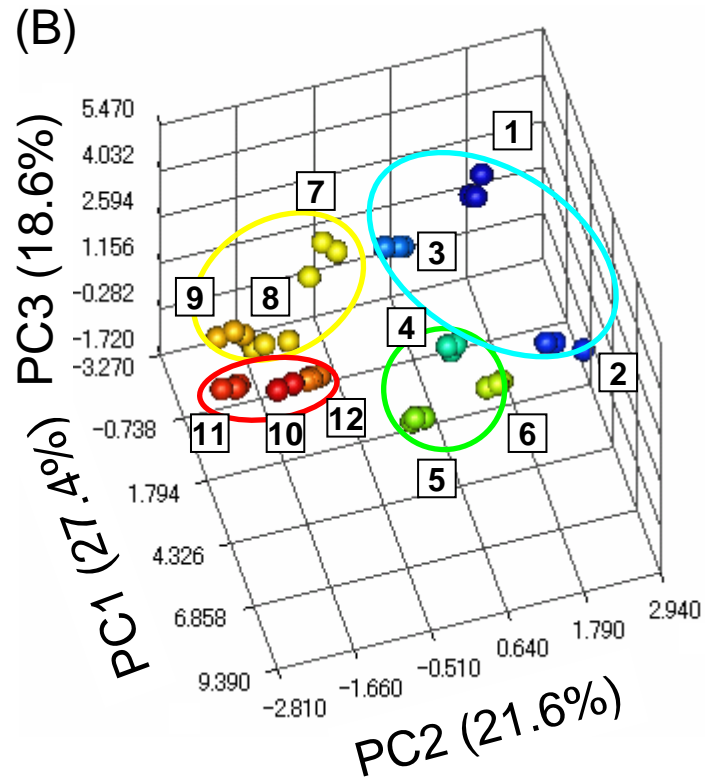

(C) Principal component for cell lines

| No | Strains        | PC1   | PC2   | PC3   |
|----|----------------|-------|-------|-------|
| 1  | A549(AD)       | -0.63 | 1.56  | 3.23  |
| 2  | ABC-1(AD)      | 0.94  | 2.63  | -0.98 |
| 3  | RERF-LC-MS(AD) | 1.57  | 0.05  | 3.92  |
| 4  | EBC-1(SQ)      | -0.72 | 1.20  | -1.59 |
| 5  | LK-2(SQ)       | 2.34  | 0.26  | -0.98 |
| 6  | LC-1/sq(SQ)    | 9.05  | 0.51  | 5.19  |
| 7  | LU65(LC)       | -3.00 | -0.41 | 0.30  |
| 8  | LU99(LC)       | -1.78 | -1.39 | -0.99 |
| 9  | 86-2(LC)       | 2.83  | -2.59 | 3.53  |
| 10 | STC 1(SC)      | 2.51  | -1.62 | 1.24  |
| 11 | RERF-LC-MA(SC) | 0.35  | -2.24 | -0.22 |
| 12 | MS-1-L(SC)     | 2.22  | -1.28 | 1.01  |

(D) Loading number for genes

|         | PC1   | PC2     | PC3   |         |       |
|---------|-------|---------|-------|---------|-------|
| PLAU    | -0.83 | STMN1   | -0.72 | RAB25   | -0.54 |
| SLCO4A1 | -0.76 | AMY2A   | -0.54 | AMY2A   | -0.51 |
| TGM2    | -0.58 | ISL1    | -0.50 | CDH1    | -0.37 |
| MALL    | -0.33 | FOXP1B  | -0.38 | ISL1    | -0.28 |
| AMY2A   | -0.32 | SLCO4A1 | -0.35 | SLCO4A1 | -0.20 |
| CDH1    | -0.04 | PLAU    | -0.31 | SI100P  | -0.18 |
| SI100P  | 0.08  | IGSF3   | 0.02  | PLAU    | 0.00  |
| ISL1    | 0.29  | MALL    | 0.27  | STMN1   | 0.21  |
| RAB25   | 0.48  | TGM2    | 0.29  | FOXP1B  | 0.31  |
| FOXP1B  | 0.55  | CDH1    | 0.50  | IGSF3   | 0.52  |
| STMN1   | 0.57  | RAB25   | 0.59  | MALL    | 0.69  |
| IGSF3   | 0.72  | SI100P  | 0.64  | TGM2    | 0.72  |
